# Supplementary material
Source: Research Square preprint supplement (doi:10.21203/rs.3.rs-9235884/v1)
Supplement: Supplementary file 1 [file 86801045e4733880a5e23ddd.docx]

**Supplementary Information**

Figures S1-S2, Tables S1

**
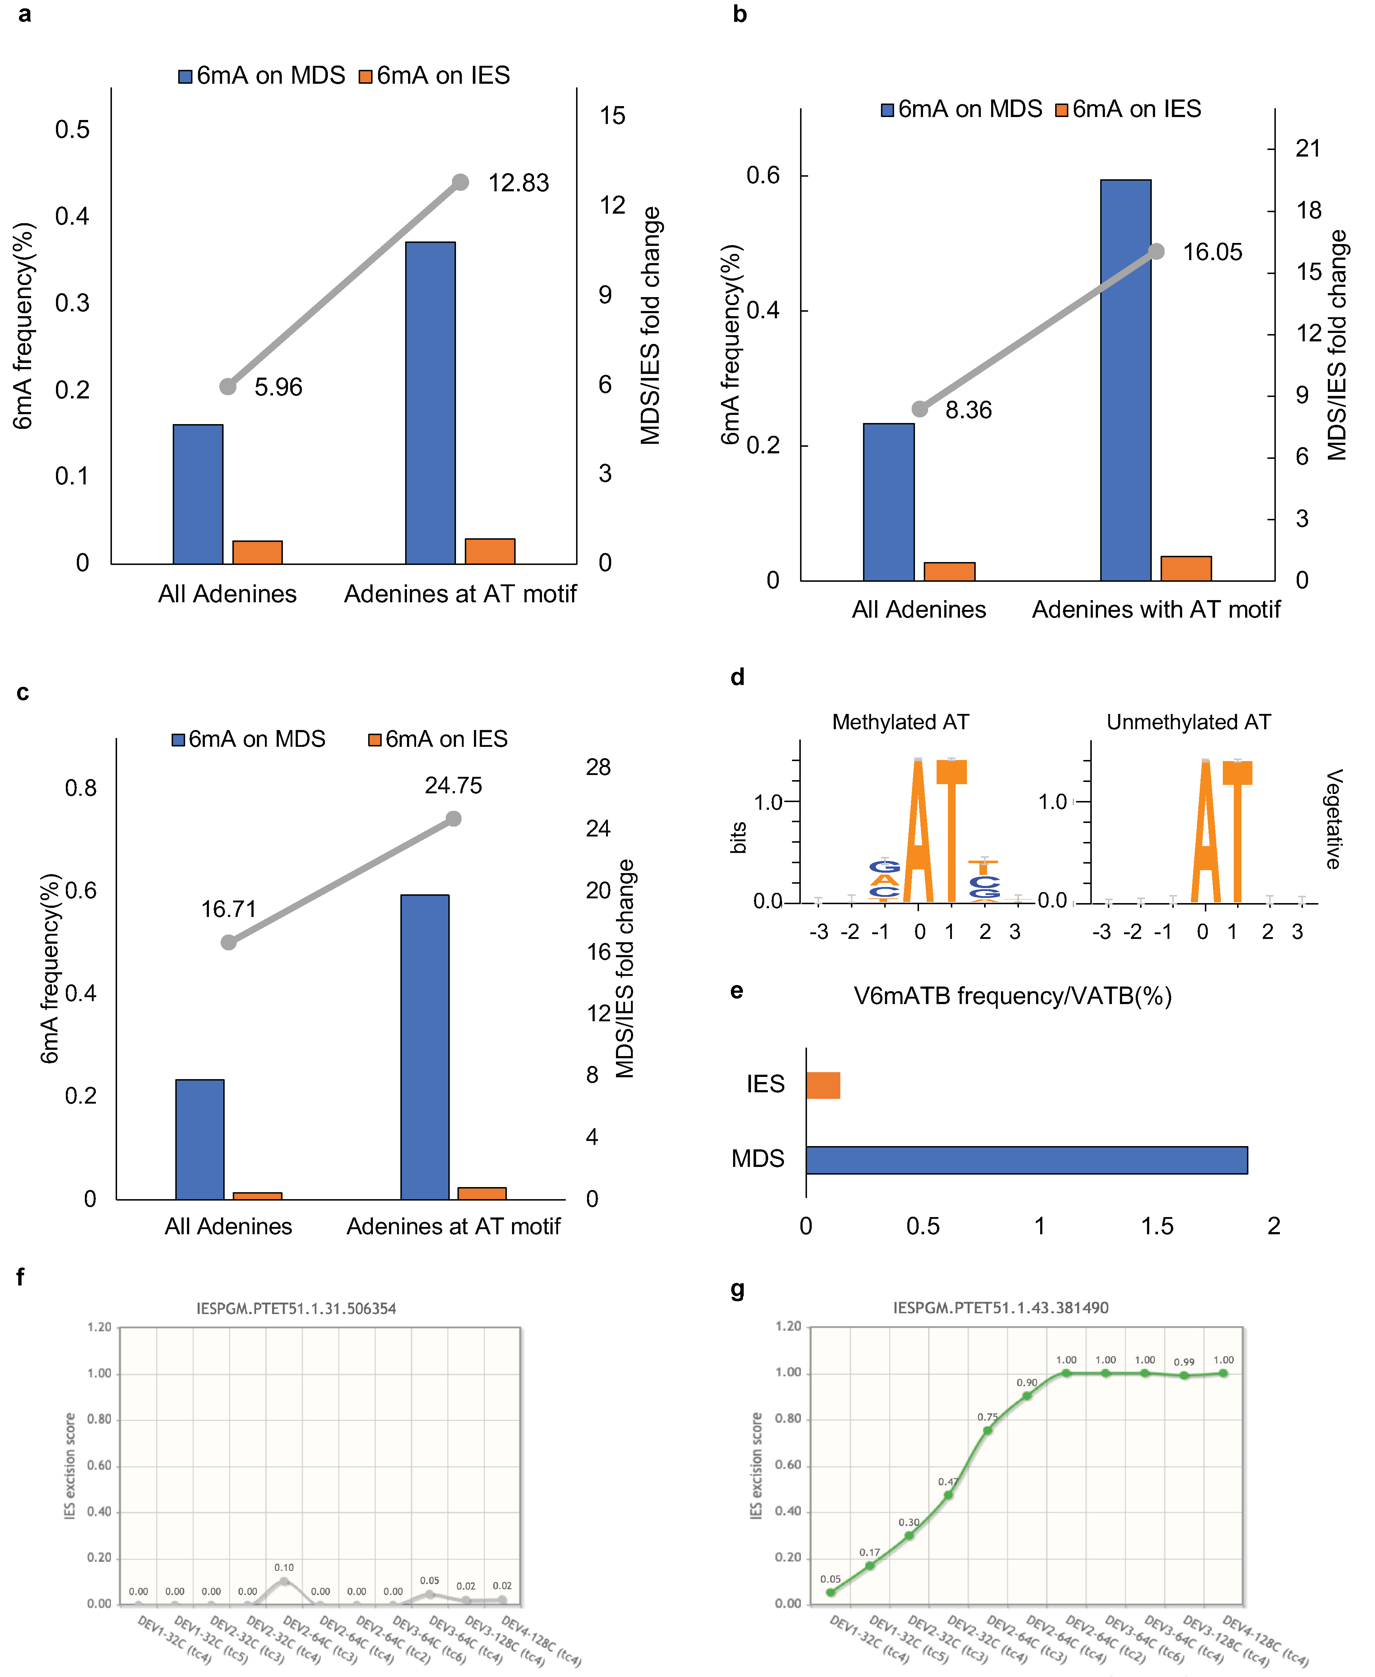
**

**Figure. S1: Further analysis of 6mA on MDS versus IES, including a wider dataset and removal of mis-annotated IESs.**

**a** 6mA levels on MDS versus IES, as in figure 1B after removal of mis-annotated IESs in the reference dataset.**b** vegetative MIC DNA reads were selected by including reads containing at least one IESs. 6mA frequencies are shown for all adenines, and for adenines within an AT motif. Fold change between MDS versus IES is indicated by the grey bar and the Y axis on the right. **c** 6mA levels on MDS versus IES, as in figure S1B after removal of mis-annotated IESs in the reference dataset. **d** Sequence logos of AT dinucleotides either methylated or unmethylated, from the PGM-KD DNA **e** 6mA frequency on MDS versus IES when only VATB motifs are taken into account from the PGM-KD DNA. **f** A representative mis-annotated IES showing excision score over development. The score is always at 0 and does not change, indicating that the IES is not excised during development. **g** A representative real IES for comparison, showing the excision score changing over time.

**
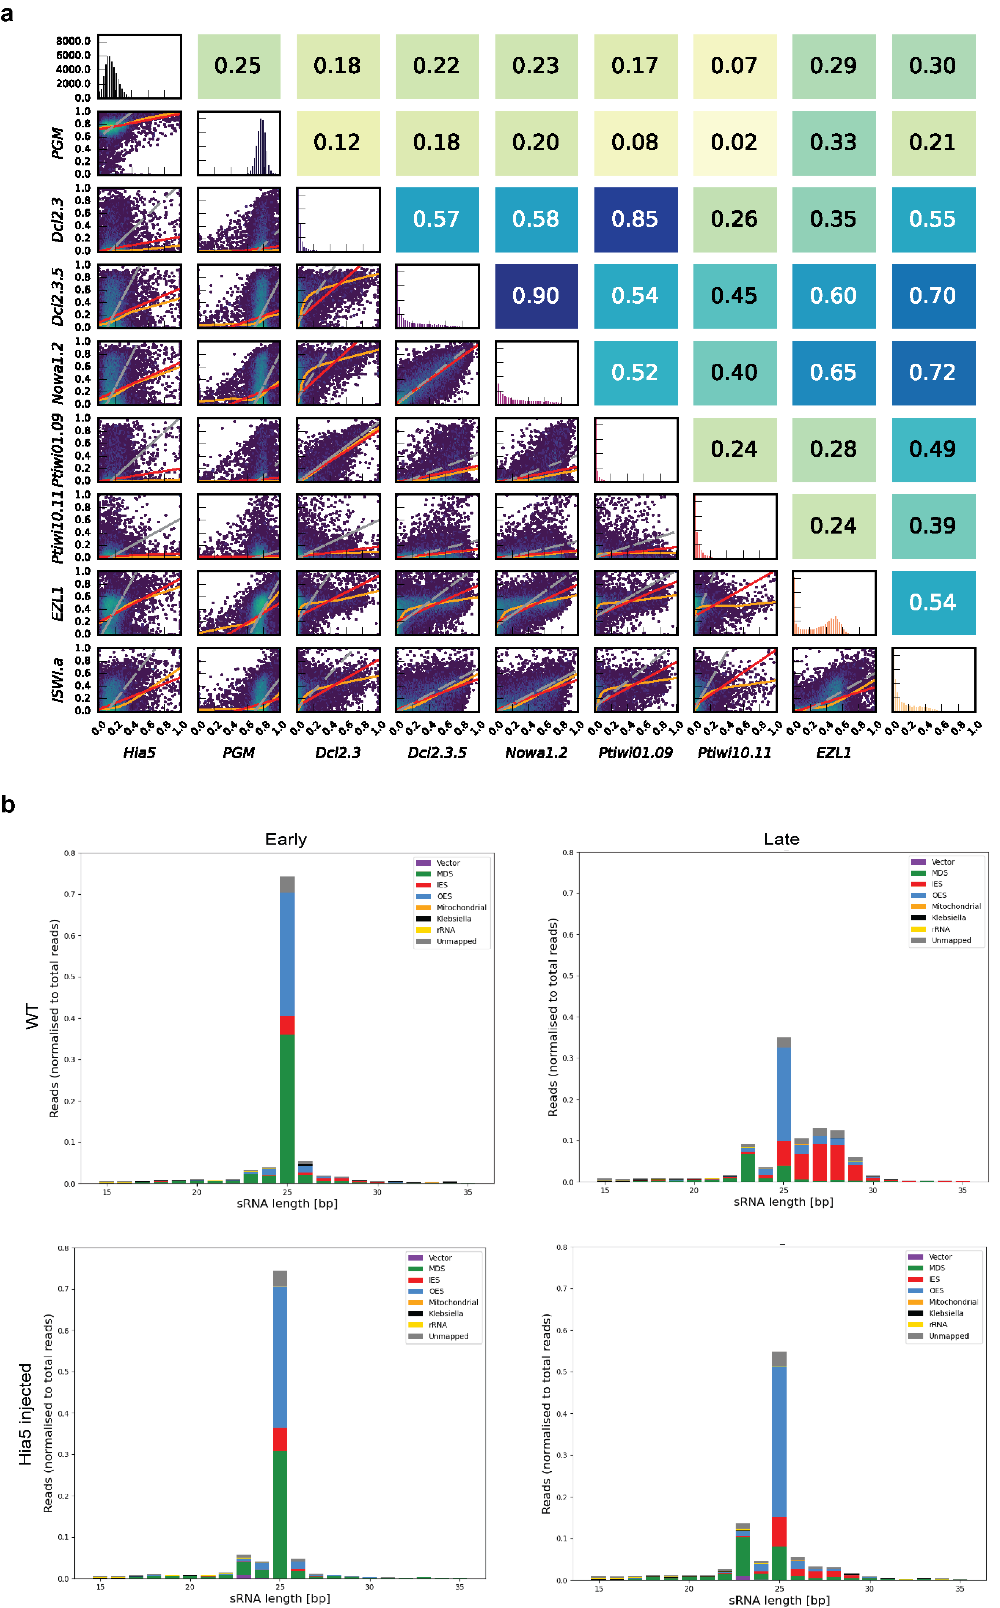
**

**Figure. S2: Assessment of whether Hia5 expression perturbs genome rearrangement through gene misregulation or small RNA pathways.**

**a** Correlation plots for IRS in Hia5-expression versus knockdowns of known genes: PiggyMac (PGM), Dcl2 and 3 (produce scanRNAs), Dcl2, 3 and 5 (all sRNAs in genome rearrangement), Nowa1 and 2 (RNA scanning), Ptiwi01 and 09 (Piwis that bind scnRNAs), Ptiwi10 and 11 (Piwis that bind iesRNAs), EZL1 (part of the PRC complex, methylates H3K9 and H3K27 during development). Correlation plots are generated as described26. Spearman’s rank correlation coefficient (rs) is given in the corresponding position diagonally opposite in the upper triangular matrix. Hia5 does not correlate with any of the analysed genes. **b** Small RNA distributions during development. The upper panels show wild-type autogamy with early versus late development. 25 nt scnRNAs are processed and the proportion of MAC-matching scnRNAs decreases over time. In later timepoints, iesRNAs appear which are produced from excised IESs, and therefore map to IESs. The lower panel shows sRNAs from Hia5-expressing cells. scnRNAs are processed normally, but iesRNAs are less abundant. Since IESs are retained in Hia5-expressing cells, there is less template for the production of iesRNAs and therefore their levels are lower. Otherwise, there is no defect in the sRNA pathway.

**Table S1. Oligo sequences used for the study.**

| REAGENT or RESOURCE | SOURCE | IDENTIFIER |
| --- | --- | --- |
| F primer to remove GFP from CenH3-GFP-Hia5 construct  TGATAAATTTAACTATTATTTAATAAATAT | This work, synthesized by Microsynth (Switzerland) | N/A |
| R primer to remove GFP from CenH3-GFP-Hia5 construct  TTTGTATAATTCATCCATGC | This work, synthesized by Microsynth (Switzerland) | N/A |
| F primer to generate CenH3-Hia5 mutant construct  TTGTTCGTTTTGGCTCCACCTTATT | This work, synthesized by Microsynth (Switzerland) | N/A |
| R primer to generate CenH3-Hia5 mutant construct  TGCTTTTGGATCATTTGAGAATTTAGGC | This work, synthesized by Microsynth (Switzerland) | N/A |
| Mating type primer F  TTCTAAGCTGATTTATTCAATTTCAACAGAAC | This work, synthesized by Microsynth (Switzerland) | N/A |
| Mating type primer R  TTGAAAAAAGGTCATCTCTTTCATTAAATTCC | This work, synthesized by Microsynth (Switzerland) | N/A |
| F primer to amplify synthesized unmethylated and methylated dsDNA  GGAACAATCCAGCCACTCAAGAT | This work, synthesized by Microsynth (Switzerland) | N/A |
| R primer to amplify synthesized unmethylated and methylated dsDNA  ACTAGCATCTGCCATTCCCAAC | This work, synthesized by Microsynth (Switzerland) | N/A |
| F primer for IES retention PCR  TGGAATAGTGCTGCATCACCAGCTGCTTGC | This work, synthesized by Microsynth (Switzerland) | N/A |
| R primer for IES retention PCR  CCAGTTATTGAACTGCAACTTACTGCAGTG | This work, synthesized by Microsynth (Switzerland) | N/A |
| CenH3-GFP-Hia5 construct (circular)  GGGCGAATTGGGCCCGACGTCGCATGCTCCCGGCCGCCATGGAATAATAAATGCATACTTTATTCACTTAAATTTATTAATGAAATAACAGTCATTTTTATGTTGATCAATTTTTATCATAACAATACCTACTCCAAAACCCAGAAAATAGGGAATTATTAATTCTACACTTTCATTTTTATTGTGAGTAGATATTGATTTATTTCTTACAAATTTTTAATATTATTTTTAAATAGTTGTTAAAAGGGAATGGCAAATAAAAAGACGACTAAAGAGAATAATAACTAATCATTTTAAGTGGACAACAACGAAAAGATGCCAAGCTTTATGCATTCATTATTTGATTCTGATGAAAAAAGTGTTATTGCAGAAAAATCAAATGAAAGAAGCAAAAAATCTGAAAAAAAAAAAGTAGAAAGGATCTCAGCAATTCAAGTATAAAAGGCAAGGGATAAGCTTTAAAAGAGAAATAAACCGATGTCAAAAGTTTTATAAGAAATTAGATAACTATAAGCATCAAGTGTATTGGTTTGCCGCCGAGCAGGATTTTAAAGGTTTGTAAGGCAGACAGGAATCAAGGTATCGGATGAACTTGGGTTTAAAGAATTTAGATATTCTAGTAAATCCTTAGAATGTCTATAAACATTAACTGAATAATACATGGTAGATTTATTCGAAGATTCTGTATAGTGTACCTTTCATGCGAAAAGGGTAACATTGATGGCAAAAGATTTAAATTTAACAGCAAGAATTCGAGGAATAGAGCAACCACTTCAAGAAATAAGAAATCTTAAACTTCGTGGAGGATCAATGAATTCTAGAGGAGAAGAACTTTTCACTGGTGTTGTTCCAATTCTTGTTGAACTTGATGGTGATGTTAATGGACATAAATTTTCTGTCTCTGGTGAGGGTGAAGGTGATGCAACTTATGGAAAATTAACCTTAAAATTTATTTGCACTACTGGAAAATTACCTGTTCCATGGCCAACACTTGTCACTACTTTAACTTATGGAGTCCAATGTTTTTCAAGGTACCCTGACCACATGAAACAACATGACTTTTTCAAATCTGCCATGCCAGAAGGATATGTCCAAGAAAGAACTATATTCTTCAAAGATGATGGAAACTACAAGACAAGAGCTGAAGTCAAATTTGAAGGAGATACCCTTGTCAATAGAATTGAGCTTAAAGGAATTGATTTTAAAGAAGATGGAAACATTTTAGGCCATAAATTGGAATACAACTATAACTCACATAATGTATACATCATGGCAGACAAACAAAAAAATGGAATCAAAGTCAACTTCAAAATTAGACACAACATTGAAGATGGATCAGTTCAATTAGCAGACCATTATCAACAAAATACTCCTATTGGAGATGGACCAGTACTTTTACCAGACAACCATTACTTATCAACACAATCTACCTTATCAAAAGATCCAAATGAAAAGAGAGATCACATGGTGTTATTAGAGTTTGTAACTGCTGCTGGAATTACACATGGCATGGATGAATTATACAAAGGAGGATCTATGGCAAATCAAAATACTTTCAAACAAGCTCCTTTGCCATTTATTGGACAAAAGAGAATGTTCTTGAAACAATTCGAACAAATTTTGAATGAAAATATTTCAGATAATGGAGAAGGATGGACTATTTTAGATACATTTGGAGGATCTGGATTGTTGTCACATACAGCAAAAAGATTGAAACCAAAAGCTAGAGTTATTTATAATGATTTCGATGGATATGCTGAAAGATTGGCACATATTGATGATATTAATCAATTGAGAGCAGAATTGTATTCTGTTGTTGGAAATGCTACTTCAAAAAATAAAAGAATGACAAAAGATTGTAAAGCAGAATGTATTAGAATTATTCAAAATTTCAAAGGATATAAAGATTTGAATTGTTTGGCATCTTGGTTGTTGTTTTCAGGACAACAAGTTGCTACTTTGGATGATTTGTTCCAACATAATTTTTGGCATTGTATTAGACAATCAGATTATCCAAAAGCTGATGGATATTTAGATGGAGTTGAAATTGTTAAAGAATCTTTCCATACATTGTTGCCTAAATTCTCAAATGATCCAAAAGCATTGTTCGTTTTGGATCCACCTTATTTGTGTACTAAACAAGAATCTTATAAACAAGCTACATATTTTGATTTGATTGATTTCTTAAGATTGGTTAATATTACTAGACCACCTTATGTTTTCTTTTCATCTACAAAATCAGAATTCATTAGATTCGTTAATTATATGTTAGAAGATAAAGTTGATAATTGGCAAGCTTTCGAAAATGCAAAAAGAATTACAGTTAATGCAAAATTAAATTATCAAGTTGCTTATGAAGATAATTTGGTTTATAAATTTTGATAAATTTAACTATTATTTAATAAATATAATTACTAACTCTATTTTATTTGTCTGCTTGTCAAATTTCAATTAGTTTTATCTGATACGATTATATAATATTGTTGTTGATGAACAATCTGTTTTAATGACAAACTTGATTATTAGAGTATCATATGAGAAAAATGTCTTAATGAAATGTGATTATATGTCTAATAAATTGAGTAATAGAAGGACTGCTACTAGTGAATTCGCGGCCGCCTGCAGGTCGACCATATGGGAGAGCTCCCAACGCGTTGGATGCATAGCTTGAGTATTCTATAGTGTCACCTAAATAGCTTGGCGTAATCATGGTCATAGCTGTTTCCTGTGTGAAATTGTTATCCGCTCACAATTCCACACAACATACGAGCCGGAAGCATAAAGTGTAAAGCCTGGGGTGCCTAATGAGTGAGCTAACTCACATTAATTGCGTTGCGCTCACTGCCCGCTTTCCAGTCGGGAAACCTGTCGTGCCAGCTGCATTAATGAATCGGCCAACGCGCGGGGAGAGGCGGTTTGCGTATTGGGCGCTCTTCCGCTTCCTCGCTCACTGACTCGCTGCGCTCGGTCGTTCGGCTGCGGCGAGCGGTATCAGCTCACTCAAAGGCGGTAATACGGTTATCCACAGAATCAGGGGATAACGCAGGAAAGAACATGTGAGCAAAAGGCCAGCAAAAGGCCAGGAACCGTAAAAAGGCCGCGTTGCTGGCGTTTTTCCATAGGCTCCGCCCCCCTGACGAGCATCACAAAAATCGACGCTCAAGTCAGAGGTGGCGAAACCCGACAGGACTATAAAGATACCAGGCGTTTCCCCCTGGAAGCTCCCTCGTGCGCTCTCCTGTTCCGACCCTGCCGCTTACCGGATACCTGTCCGCCTTTCTCCCTTCGGGAAGCGTGGCGCTTTCTCATAGCTCACGCTGTAGGTATCTCAGTTCGGTGTAGGTCGTTCGCTCCAAGCTGGGCTGTGTGCACGAACCCCCCGTTCAGCCCGACCGCTGCGCCTTATCCGGTAACTATCGTCTTGAGTCCAACCCGGTAAGACACGACTTATCGCCACTGGCAGCAGCCACTGGTAACAGGATTAGCAGAGCGAGGTATGTAGGCGGTGCTACAGAGTTCTTGAAGTGGTGGCCTAACTACGGCTACACTAGAAGAACAGTATTTGGTATCTGCGCTCTGCTGAAGCCAGTTACCTTCGGAAAAAGAGTTGGTAGCTCTTGATCCGGCAAACAAACCACCGCTGGTAGCGGTGGTTTTTTTGTTTGCAAGCAGCAGATTACGCGCAGAAAAAAAGGATCTCAAGAAGATCCTTTGATCTTTTCTACGGGGTCTGACGCTCAGTGGAACGAAAACTCACGTTAAGGGATTTTGGTCATGAGATTATCAAAAAGGATCTTCACCTAGATCCTTTTAAATTAAAAATGAAGTTTTAAATCAATCTAAAGTATATATGAGTAAACTTGGTCTGACAGTTACCAATGCTTAATCAGTGAGGCACCTATCTCAGCGATCTGTCTATTTCGTTCATCCATAGTTGCCTGACTCCCCGTCGTGTAGATAACTACGATACGGGAGGGCTTACCATCTGGCCCCAGTGCTGCAATGATACCGCGAGACCCACGCTCACCGGCTCCAGATTTATCAGCAATAAACCAGCCAGCCGGAAGGGCCGAGCGCAGAAGTGGTCCTGCAACTTTATCCGCCTCCATCCAGTCTATTAATTGTTGCCGGGAAGCTAGAGTAAGTAGTTCGCCAGTTAATAGTTTGCGCAACGTTGTTGCCATTGCTACAGGCATCGTGGTGTCACGCTCGTCGTTTGGTATGGCTTCATTCAGCTCCGGTTCCCAACGATCAAGGCGAGTTACATGATCCCCCATGTTGTGCAAAAAAGCGGTTAGCTCCTTCGGTCCTCCGATCGTTGTCAGAAGTAAGTTGGCCGCAGTGTTATCACTCATGGTTATGGCAGCACTGCATAATTCTCTTACTGTCATGCCATCCGTAAGATGCTTTTCTGTGACTGGTGAGTACTCAACCAAGTCATTCTGAGAATAGTGTATGCGGCGACCGAGTTGCTCTTGCCCGGCGTCAATACGGGATAATACCGCGCCACATAGCAGAACTTTAAAAGTGCTCATCATTGGAAAACGTTCTTCGGGGCGAAAACTCTCAAGGATCTTACCGCTGTTGAGATCCAGTTCGATGTAACCCACTCGTGCACCCAACTGATCTTCAGCATCTTTTACTTTCACCAGCGTTTCTGGGTGAGCAAAAACAGGAAGGCAAAATGCCGCAAAAAAGGGAATAAGGGCGACACGGAAATGTTGAATACTCATACTCTTCCTTTTTCAATATTATTGAAGCATTTATCAGGGTTATTGTCTCATGAGCGGATACATATTTGAATGTATTTAGAAAAATAAACAAATAGGGGTTCCGCGCACATTTCCCCGAAAAGTGCCACCTGATGCGGTGTGAAATACCGCACAGATGCGTAAGGAGAAAATACCGCATCAGGAAATTGTAAGCGTTAATATTTTGTTAAAATTCGCGTTAAATTTTTGTTAAATCAGCTCATTTTTTAACCAATAGGCCGAAATCGGCAAAATCCCTTATAAATCAAAAGAATAGACCGAGATAGGGTTGAGTGTTGTTCCAGTTTGGAACAAGAGTCCACTATTAAAGAACGTGGACTCCAACGTCAAAGGGCGAAAAACCGTCTATCAGGGCGATGGCCCACTACGTGAACCATCACCCTAATCAAGTTTTTTGGGGTCGAGGTGCCGTAAAGCACTAAATCGGAACCCTAAAGGGAGCCCCCGATTTAGAGCTTGACGGGGAAAGCCGGCGAACGTGGCGAGAAAGGAAGGGAAGAAAGCGAAAGGAGCGGGCGCTAGGGCGCTGGCAAGTGTAGCGGTCACGCTGCGCGTAACCACCACACCCGCCGCGCTTAATGCGCCGCTACAGGGCGCGTCCATTCGCCATTCAGGCTGCGCAACTGTTGGGAAGGGCGATCGGTGCGGGCCTCTTCGCTATTACGCCAGCTGGCGAAAGGGGGATGTGCTGCAAGGCGATTAAGTTGGGTAACGCCAGGGTTTTCCCAGTCACGACGTTGTAAAACGACGGCCAGTGAATTGTAATACGACTCACTATA | This work, synthesized by Genscript | N/A |
|  |  |  |
|  |  |  |
| CenH3-Hia5 construct (circular)  GGGCGAATTGGGCCCGACGTCGCATGCTCCCGGCCGCCATGGAATAATAAATGCATACTTTATTCACTTAAATTTATTAATGAAATAACAGTCATTTTTATGTTGATCAATTTTTATCATAACAATACCTACTCCAAAACCCAGAAAATAGGGAATTATTAATTCTACACTTTCATTTTTATTGTGAGTAGATATTGATTTATTTCTTACAAATTTTTAATATTATTTTTAAATAGTTGTTAAAAGGGAATGGCAAATAAAAAGACGACTAAAGAGAATAATAACTAATCATTTTAAGTGGACAACAACGAAAAGATGCCAAGCTTTATGCATTCATTATTTGATTCTGATGAAAAAAGTGTTATTGCAGAAAAATCAAATGAAAGAAGCAAAAAATCTGAAAAAAAAAAAGTAGAAAGGATCTCAGCAATTCAAGTATAAAAGGCAAGGGATAAGCTTTAAAAGAGAAATAAACCGATGTCAAAAGTTTTATAAGAAATTAGATAACTATAAGCATCAAGTGTATTGGTTTGCCGCCGAGCAGGATTTTAAAGGTTTGTAAGGCAGACAGGAATCAAGGTATCGGATGAACTTGGGTTTAAAGAATTTAGATATTCTAGTAAATCCTTAGAATGTCTATAAACATTAACTGAATAATACATGGTAGATTTATTCGAAGATTCTGTATAGTGTACCTTTCATGCGAAAAGGGTAACATTGATGGCAAAAGATTTAAATTTAACAGCAAGAATTCGAGGAATAGAGCAACCACTTCAAGAAATAAGAAATCTTAAACTTCGTGGAGGATCTATGGCAAATCAAAATACTTTCAAACAAGCTCCTTTGCCATTTATTGGACAAAAGAGAATGTTCTTGAAACAATTCGAACAAATTTTGAATGAAAATATTTCAGATAATGGAGAAGGATGGACTATTTTAGATACATTTGGAGGATCTGGATTGTTGTCACATACAGCAAAAAGATTGAAACCAAAAGCTAGAGTTATTTATAATGATTTCGATGGATATGCTGAAAGATTGGCACATATTGATGATATTAATCAATTGAGAGCAGAATTGTATTCTGTTGTTGGAAATGCTACTTCAAAAAATAAAAGAATGACAAAAGATTGTAAAGCAGAATGTATTAGAATTATTCAAAATTTCAAAGGATATAAAGATTTGAATTGTTTGGCATCTTGGTTGTTGTTTTCAGGACAACAAGTTGCTACTTTGGATGATTTGTTCCAACATAATTTTTGGCATTGTATTAGACAATCAGATTATCCAAAAGCTGATGGATATTTAGATGGAGTTGAAATTGTTAAAGAATCTTTCCATACATTGTTGCCTAAATTCTCAAATGATCCAAAAGCATTGTTCGTTTTGGATCCACCTTATTTGTGTACTAAACAAGAATCTTATAAACAAGCTACATATTTTGATTTGATTGATTTCTTAAGATTGGTTAATATTACTAGACCACCTTATGTTTTCTTTTCATCTACAAAATCAGAATTCATTAGATTCGTTAATTATATGTTAGAAGATAAAGTTGATAATTGGCAAGCTTTCGAAAATGCAAAAAGAATTACAGTTAATGCAAAATTAAATTATCAAGTTGCTTATGAAGATAATTTGGTTTATAAATTTTGATAAATTTAACTATTATTTAATAAATATAATTACTAACTCTATTTTATTTGTCTGCTTGTCAAATTTCAATTAGTTTTATCTGATACGATTATATAATATTGTTGTTGATGAACAATCTGTTTTAATGACAAACTTGATTATTAGAGTATCATATGAGAAAAATGTCTTAATGAAATGTGATTATATGTCTAATAAATTGAGTAATAGAAGGACTGCTACTAGTGAATTCGCGGCCGCCTGCAGGTCGACCATATGGGAGAGCTCCCAACGCGTTGGATGCATAGCTTGAGTATTCTATAGTGTCACCTAAATAGCTTGGCGTAATCATGGTCATAGCTGTTTCCTGTGTGAAATTGTTATCCGCTCACAATTCCACACAACATACGAGCCGGAAGCATAAAGTGTAAAGCCTGGGGTGCCTAATGAGTGAGCTAACTCACATTAATTGCGTTGCGCTCACTGCCCGCTTTCCAGTCGGGAAACCTGTCGTGCCAGCTGCATTAATGAATCGGCCAACGCGCGGGGAGAGGCGGTTTGCGTATTGGGCGCTCTTCCGCTTCCTCGCTCACTGACTCGCTGCGCTCGGTCGTTCGGCTGCGGCGAGCGGTATCAGCTCACTCAAAGGCGGTAATACGGTTATCCACAGAATCAGGGGATAACGCAGGAAAGAACATGTGAGCAAAAGGCCAGCAAAAGGCCAGGAACCGTAAAAAGGCCGCGTTGCTGGCGTTTTTCCATAGGCTCCGCCCCCCTGACGAGCATCACAAAAATCGACGCTCAAGTCAGAGGTGGCGAAACCCGACAGGACTATAAAGATACCAGGCGTTTCCCCCTGGAAGCTCCCTCGTGCGCTCTCCTGTTCCGACCCTGCCGCTTACCGGATACCTGTCCGCCTTTCTCCCTTCGGGAAGCGTGGCGCTTTCTCATAGCTCACGCTGTAGGTATCTCAGTTCGGTGTAGGTCGTTCGCTCCAAGCTGGGCTGTGTGCACGAACCCCCCGTTCAGCCCGACCGCTGCGCCTTATCCGGTAACTATCGTCTTGAGTCCAACCCGGTAAGACACGACTTATCGCCACTGGCAGCAGCCACTGGTAACAGGATTAGCAGAGCGAGGTATGTAGGCGGTGCTACAGAGTTCTTGAAGTGGTGGCCTAACTACGGCTACACTAGAAGAACAGTATTTGGTATCTGCGCTCTGCTGAAGCCAGTTACCTTCGGAAAAAGAGTTGGTAGCTCTTGATCCGGCAAACAAACCACCGCTGGTAGCGGTGGTTTTTTTGTTTGCAAGCAGCAGATTACGCGCAGAAAAAAAGGATCTCAAGAAGATCCTTTGATCTTTTCTACGGGGTCTGACGCTCAGTGGAACGAAAACTCACGTTAAGGGATTTTGGTCATGAGATTATCAAAAAGGATCTTCACCTAGATCCTTTTAAATTAAAAATGAAGTTTTAAATCAATCTAAAGTATATATGAGTAAACTTGGTCTGACAGTTACCAATGCTTAATCAGTGAGGCACCTATCTCAGCGATCTGTCTATTTCGTTCATCCATAGTTGCCTGACTCCCCGTCGTGTAGATAACTACGATACGGGAGGGCTTACCATCTGGCCCCAGTGCTGCAATGATACCGCGAGACCCACGCTCACCGGCTCCAGATTTATCAGCAATAAACCAGCCAGCCGGAAGGGCCGAGCGCAGAAGTGGTCCTGCAACTTTATCCGCCTCCATCCAGTCTATTAATTGTTGCCGGGAAGCTAGAGTAAGTAGTTCGCCAGTTAATAGTTTGCGCAACGTTGTTGCCATTGCTACAGGCATCGTGGTGTCACGCTCGTCGTTTGGTATGGCTTCATTCAGCTCCGGTTCCCAACGATCAAGGCGAGTTACATGATCCCCCATGTTGTGCAAAAAAGCGGTTAGCTCCTTCGGTCCTCCGATCGTTGTCAGAAGTAAGTTGGCCGCAGTGTTATCACTCATGGTTATGGCAGCACTGCATAATTCTCTTACTGTCATGCCATCCGTAAGATGCTTTTCTGTGACTGGTGAGTACTCAACCAAGTCATTCTGAGAATAGTGTATGCGGCGACCGAGTTGCTCTTGCCCGGCGTCAATACGGGATAATACCGCGCCACATAGCAGAACTTTAAAAGTGCTCATCATTGGAAAACGTTCTTCGGGGCGAAAACTCTCAAGGATCTTACCGCTGTTGAGATCCAGTTCGATGTAACCCACTCGTGCACCCAACTGATCTTCAGCATCTTTTACTTTCACCAGCGTTTCTGGGTGAGCAAAAACAGGAAGGCAAAATGCCGCAAAAAAGGGAATAAGGGCGACACGGAAATGTTGAATACTCATACTCTTCCTTTTTCAATATTATTGAAGCATTTATCAGGGTTATTGTCTCATGAGCGGATACATATTTGAATGTATTTAGAAAAATAAACAAATAGGGGTTCCGCGCACATTTCCCCGAAAAGTGCCACCTGATGCGGTGTGAAATACCGCACAGATGCGTAAGGAGAAAATACCGCATCAGGAAATTGTAAGCGTTAATATTTTGTTAAAATTCGCGTTAAATTTTTGTTAAATCAGCTCATTTTTTAACCAATAGGCCGAAATCGGCAAAATCCCTTATAAATCAAAAGAATAGACCGAGATAGGGTTGAGTGTTGTTCCAGTTTGGAACAAGAGTCCACTATTAAAGAACGTGGACTCCAACGTCAAAGGGCGAAAAACCGTCTATCAGGGCGATGGCCCACTACGTGAACCATCACCCTAATCAAGTTTTTTGGGGTCGAGGTGCCGTAAAGCACTAAATCGGAACCCTAAAGGGAGCCCCCGATTTAGAGCTTGACGGGGAAAGCCGGCGAACGTGGCGAGAAAGGAAGGGAAGAAAGCGAAAGGAGCGGGCGCTAGGGCGCTGGCAAGTGTAGCGGTCACGCTGCGCGTAACCACCACACCCGCCGCGCTTAATGCGCCGCTACAGGGCGCGTCCATTCGCCATTCAGGCTGCGCAACTGTTGGGAAGGGCGATCGGTGCGGGCCTCTTCGCTATTACGCCAGCTGGCGAAAGGGGGATGTGCTGCAAGGCGATTAAGTTGGGTAACGCCAGGGTTTTCCCAGTCACGACGTTGTAAAACGACGGCCAGTGAATTGTAATACGACTCACTATA | This work, generated using primers described above | N/A |
| CenH3-Hia5 D194A construct (circular)  GGGCGAATTGGGCCCGACGTCGCATGCTCCCGGCCGCCATGGAATAATAAATGCATACTTTATTCACTTAAATTTATTAATGAAATAACAGTCATTTTTATGTTGATCAATTTTTATCATAACAATACCTACTCCAAAACCCAGAAAATAGGGAATTATTAATTCTACACTTTCATTTTTATTGTGAGTAGATATTGATTTATTTCTTACAAATTTTTAATATTATTTTTAAATAGTTGTTAAAAGGGAATGGCAAATAAAAAGACGACTAAAGAGAATAATAACTAATCATTTTAAGTGGACAACAACGAAAAGATGCCAAGCTTTATGCATTCATTATTTGATTCTGATGAAAAAAGTGTTATTGCAGAAAAATCAAATGAAAGAAGCAAAAAATCTGAAAAAAAAAAAGTAGAAAGGATCTCAGCAATTCAAGTATAAAAGGCAAGGGATAAGCTTTAAAAGAGAAATAAACCGATGTCAAAAGTTTTATAAGAAATTAGATAACTATAAGCATCAAGTGTATTGGTTTGCCGCCGAGCAGGATTTTAAAGGTTTGTAAGGCAGACAGGAATCAAGGTATCGGATGAACTTGGGTTTAAAGAATTTAGATATTCTAGTAAATCCTTAGAATGTCTATAAACATTAACTGAATAATACATGGTAGATTTATTCGAAGATTCTGTATAGTGTACCTTTCATGCGAAAAGGGTAACATTGATGGCAAAAGATTTAAATTTAACAGCAAGAATTCGAGGAATAGAGCAACCACTTCAAGAAATAAGAAATCTTAAACTTCGTGGAGGATCTATGGCAAATCAAAATACTTTCAAACAAGCTCCTTTGCCATTTATTGGACAAAAGAGAATGTTCTTGAAACAATTCGAACAAATTTTGAATGAAAATATTTCAGATAATGGAGAAGGATGGACTATTTTAGATACATTTGGAGGATCTGGATTGTTGTCACATACAGCAAAAAGATTGAAACCAAAAGCTAGAGTTATTTATAATGATTTCGATGGATATGCTGAAAGATTGGCACATATTGATGATATTAATCAATTGAGAGCAGAATTGTATTCTGTTGTTGGAAATGCTACTTCAAAAAATAAAAGAATGACAAAAGATTGTAAAGCAGAATGTATTAGAATTATTCAAAATTTCAAAGGATATAAAGATTTGAATTGTTTGGCATCTTGGTTGTTGTTTTCAGGACAACAAGTTGCTACTTTGGATGATTTGTTCCAACATAATTTTTGGCATTGTATTAGACAATCAGATTATCCAAAAGCTGATGGATATTTAGATGGAGTTGAAATTGTTAAAGAATCTTTCCATACATTGTTGCCTAAATTCTCAAATGATCCAAAAGCATTGTTCGTTTTGGCTCCACCTTATTTGTGTACTAAACAAGAATCTTATAAACAAGCTACATATTTTGATTTGATTGATTTCTTAAGATTGGTTAATATTACTAGACCACCTTATGTTTTCTTTTCATCTACAAAATCAGAATTCATTAGATTCGTTAATTATATGTTAGAAGATAAAGTTGATAATTGGCAAGCTTTCGAAAATGCAAAAAGAATTACAGTTAATGCAAAATTAAATTATCAAGTTGCTTATGAAGATAATTTGGTTTATAAATTTTGATAAATTTAACTATTATTTAATAAATATAATTACTAACTCTATTTTATTTGTCTGCTTGTCAAATTTCAATTAGTTTTATCTGATACGATTATATAATATTGTTGTTGATGAACAATCTGTTTTAATGACAAACTTGATTATTAGAGTATCATATGAGAAAAATGTCTTAATGAAATGTGATTATATGTCTAATAAATTGAGTAATAGAAGGACTGCTACTAGTGAATTCGCGGCCGCCTGCAGGTCGACCATATGGGAGAGCTCCCAACGCGTTGGATGCATAGCTTGAGTATTCTATAGTGTCACCTAAATAGCTTGGCGTAATCATGGTCATAGCTGTTTCCTGTGTGAAATTGTTATCCGCTCACAATTCCACACAACATACGAGCCGGAAGCATAAAGTGTAAAGCCTGGGGTGCCTAATGAGTGAGCTAACTCACATTAATTGCGTTGCGCTCACTGCCCGCTTTCCAGTCGGGAAACCTGTCGTGCCAGCTGCATTAATGAATCGGCCAACGCGCGGGGAGAGGCGGTTTGCGTATTGGGCGCTCTTCCGCTTCCTCGCTCACTGACTCGCTGCGCTCGGTCGTTCGGCTGCGGCGAGCGGTATCAGCTCACTCAAAGGCGGTAATACGGTTATCCACAGAATCAGGGGATAACGCAGGAAAGAACATGTGAGCAAAAGGCCAGCAAAAGGCCAGGAACCGTAAAAAGGCCGCGTTGCTGGCGTTTTTCCATAGGCTCCGCCCCCCTGACGAGCATCACAAAAATCGACGCTCAAGTCAGAGGTGGCGAAACCCGACAGGACTATAAAGATACCAGGCGTTTCCCCCTGGAAGCTCCCTCGTGCGCTCTCCTGTTCCGACCCTGCCGCTTACCGGATACCTGTCCGCCTTTCTCCCTTCGGGAAGCGTGGCGCTTTCTCATAGCTCACGCTGTAGGTATCTCAGTTCGGTGTAGGTCGTTCGCTCCAAGCTGGGCTGTGTGCACGAACCCCCCGTTCAGCCCGACCGCTGCGCCTTATCCGGTAACTATCGTCTTGAGTCCAACCCGGTAAGACACGACTTATCGCCACTGGCAGCAGCCACTGGTAACAGGATTAGCAGAGCGAGGTATGTAGGCGGTGCTACAGAGTTCTTGAAGTGGTGGCCTAACTACGGCTACACTAGAAGAACAGTATTTGGTATCTGCGCTCTGCTGAAGCCAGTTACCTTCGGAAAAAGAGTTGGTAGCTCTTGATCCGGCAAACAAACCACCGCTGGTAGCGGTGGTTTTTTTGTTTGCAAGCAGCAGATTACGCGCAGAAAAAAAGGATCTCAAGAAGATCCTTTGATCTTTTCTACGGGGTCTGACGCTCAGTGGAACGAAAACTCACGTTAAGGGATTTTGGTCATGAGATTATCAAAAAGGATCTTCACCTAGATCCTTTTAAATTAAAAATGAAGTTTTAAATCAATCTAAAGTATATATGAGTAAACTTGGTCTGACAGTTACCAATGCTTAATCAGTGAGGCACCTATCTCAGCGATCTGTCTATTTCGTTCATCCATAGTTGCCTGACTCCCCGTCGTGTAGATAACTACGATACGGGAGGGCTTACCATCTGGCCCCAGTGCTGCAATGATACCGCGAGACCCACGCTCACCGGCTCCAGATTTATCAGCAATAAACCAGCCAGCCGGAAGGGCCGAGCGCAGAAGTGGTCCTGCAACTTTATCCGCCTCCATCCAGTCTATTAATTGTTGCCGGGAAGCTAGAGTAAGTAGTTCGCCAGTTAATAGTTTGCGCAACGTTGTTGCCATTGCTACAGGCATCGTGGTGTCACGCTCGTCGTTTGGTATGGCTTCATTCAGCTCCGGTTCCCAACGATCAAGGCGAGTTACATGATCCCCCATGTTGTGCAAAAAAGCGGTTAGCTCCTTCGGTCCTCCGATCGTTGTCAGAAGTAAGTTGGCCGCAGTGTTATCACTCATGGTTATGGCAGCACTGCATAATTCTCTTACTGTCATGCCATCCGTAAGATGCTTTTCTGTGACTGGTGAGTACTCAACCAAGTCATTCTGAGAATAGTGTATGCGGCGACCGAGTTGCTCTTGCCCGGCGTCAATACGGGATAATACCGCGCCACATAGCAGAACTTTAAAAGTGCTCATCATTGGAAAACGTTCTTCGGGGCGAAAACTCTCAAGGATCTTACCGCTGTTGAGATCCAGTTCGATGTAACCCACTCGTGCACCCAACTGATCTTCAGCATCTTTTACTTTCACCAGCGTTTCTGGGTGAGCAAAAACAGGAAGGCAAAATGCCGCAAAAAAGGGAATAAGGGCGACACGGAAATGTTGAATACTCATACTCTTCCTTTTTCAATATTATTGAAGCATTTATCAGGGTTATTGTCTCATGAGCGGATACATATTTGAATGTATTTAGAAAAATAAACAAATAGGGGTTCCGCGCACATTTCCCCGAAAAGTGCCACCTGATGCGGTGTGAAATACCGCACAGATGCGTAAGGAGAAAATACCGCATCAGGAAATTGTAAGCGTTAATATTTTGTTAAAATTCGCGTTAAATTTTTGTTAAATCAGCTCATTTTTTAACCAATAGGCCGAAATCGGCAAAATCCCTTATAAATCAAAAGAATAGACCGAGATAGGGTTGAGTGTTGTTCCAGTTTGGAACAAGAGTCCACTATTAAAGAACGTGGACTCCAACGTCAAAGGGCGAAAAACCGTCTATCAGGGCGATGGCCCACTACGTGAACCATCACCCTAATCAAGTTTTTTGGGGTCGAGGTGCCGTAAAGCACTAAATCGGAACCCTAAAGGGAGCCCCCGATTTAGAGCTTGACGGGGAAAGCCGGCGAACGTGGCGAGAAAGGAAGGGAAGAAAGCGAAAGGAGCGGGCGCTAGGGCGCTGGCAAGTGTAGCGGTCACGCTGCGCGTAACCACCACACCCGCCGCGCTTAATGCGCCGCTACAGGGCGCGTCCATTCGCCATTCAGGCTGCGCAACTGTTGGGAAGGGCGATCGGTGCGGGCCTCTTCGCTATTACGCCAGCTGGCGAAAGGGGGATGTGCTGCAAGGCGATTAAGTTGGGTAACGCCAGGGTTTTCCCAGTCACGACGTTGTAAAACGACGGCCAGTGAATTGTAATACGACTCACTATA | This work, generated using primers described above | N/A |
| synthesized unmethylated sequence: 5’  GGAACAATCCAGCCACTCAAGATCAGGCCAATGTTGGCAGACAGTATAGAGGAATAAATGTGGGATGTCTGCTATACTTTTTATAGAACTACATCGTTGTTGGGAATGGCAGATGCTAGT | This work, synthesized by Genscript | N/A |
| synthesized unmethylated sequence: 3’  ACTAGCATCTGCCATTCCCAACAACGATGTAGTTCTATAAAAAGTATAGCAGACATCCCACATTTATTCCTCTATACTGTCTGCCAACATTGGCCTGATCTTGAGTGGCTGGATTGTTCC | This work, synthesized by Genscript | N/A |
| synthesized methylated sequence: 5’  GGAACAATCCAGCCACTCAAGATCAGGCCACCCTTGGCAGACAGT/iN6-Me-dA/TAGAGGAATAA/iN6-Me-dA/TGTGGG/iN6-Me-dA/TGTCTGCT/iN6-Me-dA/TACTTTTTATAGAACTACATCGTTGTTGGGAATGGCAGATGCTAGT | This work, synthesized by Genscript | N/A |
| synthesized methylated sequence: 3’  ACTAGCATCTGCCATTCCCAACAACGATGTAGTTCTATAAAAAGT/iN6-Me-dA/TAGCAGAC/iN6-Me-dA/TCCCAC/iN6-Me-dA/TTTATTCCTCT/iN6-Me-dA/TACTGTCTGCCAAGGGTGGCCTGATCTTGAGTGGCTGGATTGTTCC | This work, synthesized by Genscript | N/A |
